# Supplementary material for: Long noncoding RNAs in lipid metabolism: literature review and conservation analysis across species
Source: PubMed Central journal article supplement (PMC6868825; doi:10.1186/s12864-019-6093-3), 2019-11-21

*e!* HMGCR isoforms

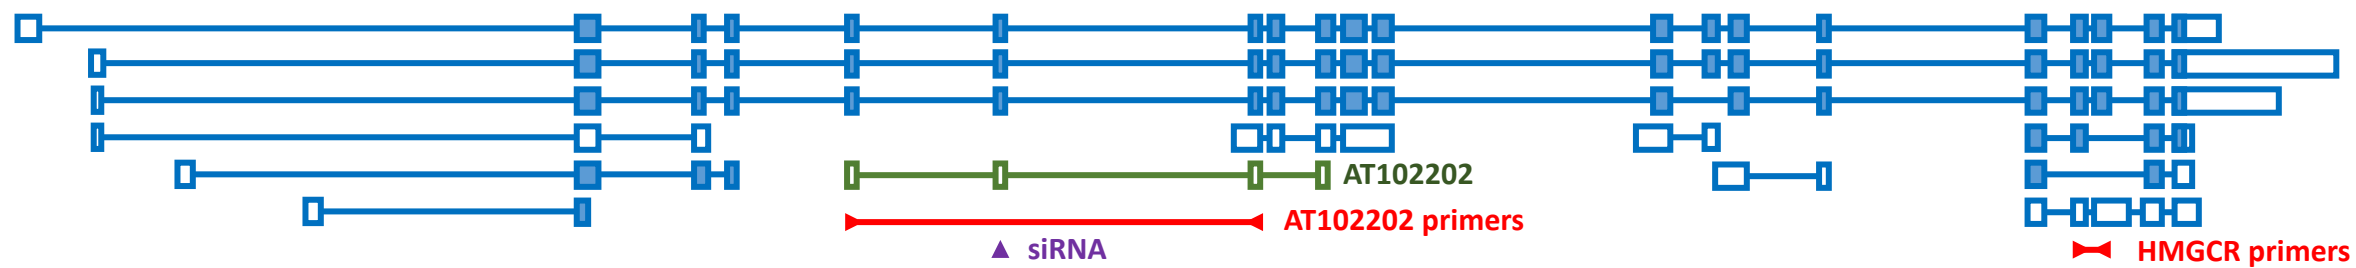

Supplement: 12864_2019_6093_MOESM1_ESM.pdf [file 12864_2019_6093_MOESM1_ESM.pdf]
